# Supplementary material
Source: Springer Nature journal article supplement (https://www.springermedizin.de/resource/supplementary/12889_2009_1936_MOESM1_ESM.pdf/9484798)

T-1: PCC BONAVISTA  
T-2: PCC TORREFORTA  
T-3: PCC JAUME I  
T-5: PCC ST. PERE I ST. PAU  
T-6: PCC TARRACO  
T-7: PCC ST. SALVADOR

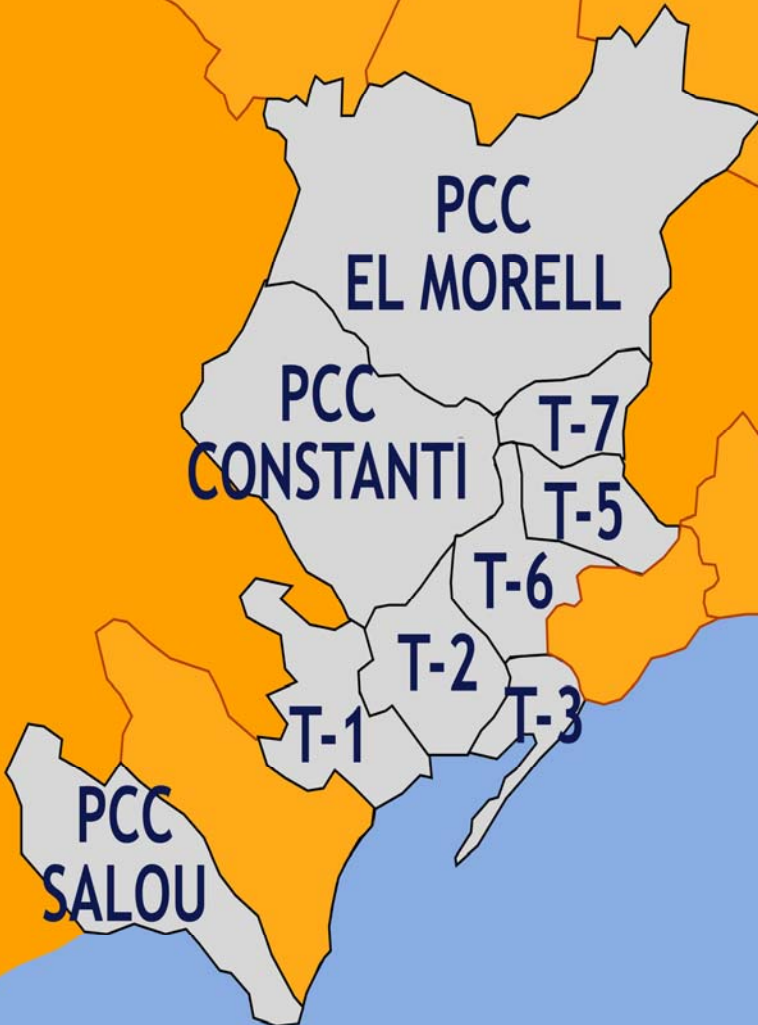

Supplement: MOESM1 [file 9484798]
